# Supplementary material
Source: publisher figshare collection journal article supplement (https://karger.figshare.com/ndownloader/files/37615202)
Supplement: Supplementary file 1 [file 37615202]

*Can you hear me clearly?

*Consent

These first few questions are to give me an idea about your experiences with genetic testing and your general feelings about testing.

- Have you had genetic testing?
  - If no: end interview
- Was the test ordered by a health care provider or did you order it directly from the company that did the testing?
  - If ordered by physician: end interview
  - If they ordered it directly: we call this direct-to-consumer or DTC testing
- How do you describe your race or ethnicity?
  - If not Black or African-American: end interview.
- How many times have you done DTC genetic testing (if more than once then all the questions will be regarding the most recent testing they had done)
- Did you order the test or was it given to you?
- What genetic testing kit did you purchase or use, like the company and type of kit?
  - Why did you choose that company?
- What year did your order your test?
- Why did you buy or use the kit?
  - Examples (only suggest if interviewee requests): for fun, to learn more about health, family ancestry
- What do you think about genetic testing in general?
  - Prompt (if interviewee needs clarification): exciting/worrisome, good/bad, not what you expected
- What do you understand are the pros of genetic testing in general?
- What do you understand are the cons of genetic testing in general?

These next set of questions will be about the ordering of your DTC test

- Where did you get information about the kit before using it?
  - Examples (only suggest if interviewee requests): company website, TV commercials, friends/family, other websites not associated with the company you tested with
- Did you speak to a healthcare provider about the DTC test before using it?
  - If yes: what kind of provider and what did you talk about?
- Could you walk me through the process of ordering your test? Particularly what information you were given or learned?
  - Prompt: like what website you used to order the test and the pages with information you visited
- Do you remember if there was any information about the privacy policy or terms of use statement from the company?
  - If yes:
    - Did you read this information?
      - If yes: How much?
        - If less than all of it: why did you not read it all?
  - If no:
    - Was there any particular reason why you didn’t look at it?

Now I’m going to ask questions about when you received you test kit and took the sample.

- Did you have any questions after receiving the test kit?
  - If yes: What kind of questions did you have?
    - Did you look for answers to your questions?
      - If yes: where did you look for answers? What kind of answers did you find?
- After receiving your kit, how long did you have it before you sent it back?
  - if more than a week: why the delay?

Now I’m going to ask questions about your test results?

- How did you receive your results?

Now I want to learn what you think about information you were provided and your thoughts on various scenarios.

- Do you think your genetic information, results, or sample is used after your testing is complete by the company for any other purpose?
  - If yes:
    - How do you think it might be used?
    - Is there any other way it might be used?
    - What would you think if it is used?
    - What is your reasoning for thinking this way? (Source of information)
  - If no:
    - What would you think if it is used?
  - After previous questions:
    - Would it be okay if they used it for other research?
      - If yes: what types of research would be okay and what types would not?
    - What about if they used it for non-research purposes, such as law enforcement,
    - cloning,
    - product development,
    - or selling of information?
    - What types of non-research purposes would be okay?
- Do you know if you can request that (the company that did the DNA test), not use your sample or data after your testing is complete?
  - What if they say that you cannot opt out of future use of your sample or data?
- Do you know if (the company that did the DNA test), could sell samples or client data?
  - If yes: How did you learn about this?
  - What do you think about DTC testing companies selling DNA samples or client data?
- If your name, date of birth, and other such identifying information is not included with your DNA, do you think you can still be identified from it?
  - Regardless of answer: if this is possible would it be okay? Why or why not?
- Do you know if there are laws that protect individuals from genetic discrimination in the workplace and for insurance?
  - If yes:
    - What do you know about these laws?
    - How did you learn about these laws?
    - Do you think these laws are useful?
    - There is a federal law call the Genetic Information Non-discrimination Act, commonly called GINA, that does protect individuals from their genetic information being used against them in the workplace and for certain insurance coverage. However, these laws do not protect the ability to get all types of insurance coverage, such as life insurance.
    - Do you think it possible that some individuals might not be able to purchase insurance because of a DTC DNA test result?
      - If yes, why?
  - If no:
    - There is a federal law call the Genetic Information Non-discrimination Act, commonly called GINA, that does protect individuals from their genetic information being used against them in the workplace and for certain insurance coverage. However, these laws do not protect the ability to get all types of insurance coverage, such as life insurance.
    - Do you think it possible that some individuals might not be able to purchase insurance because of a DTC DNA test result?
      - If yes, why?
- Medical centers and healthcare providers such as hospitals or corporations may also use patients’ specimens and information for research. Would you be more or less concerned if your information was used by a healthcare provider than a DTC genetic testing company, such as (the company that did the DNA test)?
  - If there is a difference:
    - What difference is there for you between a medical center and a DNA testing company?

Now I’d like to learn what you think about what we have talked about?

- What do you think about how DNA could be used for purposes other than providing you with your test results?
- Do you have any concerns about what we’ve talked about?
- Do you think the company should do anything differently?

Lastly, I’d like to ask some questions about your background just so we can have an idea about who participated in this study. This information is going to be aggregated with the other people that have done this interview and will not be able to be connected back to you.

- What is the highest education level you’ve completed?
- What is your profession?
- How old are you?
- What gender do you identify as?
- What is your current relationship status?
- How would you describe your ethnicity (i.e. Caucasian, African American)?
- What is your preferred email address (so we can send the gift card)?

*THANK YOU

If interviewee expresses concern for not knowing the answers: there are no rights or wrongs to these answers, we are just trying to understand your experience

**AMAZON CODE GIVEN:**
